# Supplementary material
Source: PubMed Central journal article supplement (PMC3821715)
Supplement: supp_01.wnl.0000435558.98447.17_Figure_e-3.pdf [file supp_01.wnl.0000435558.98447.17_Figure_e-3.pdf]

**Figure e-3**

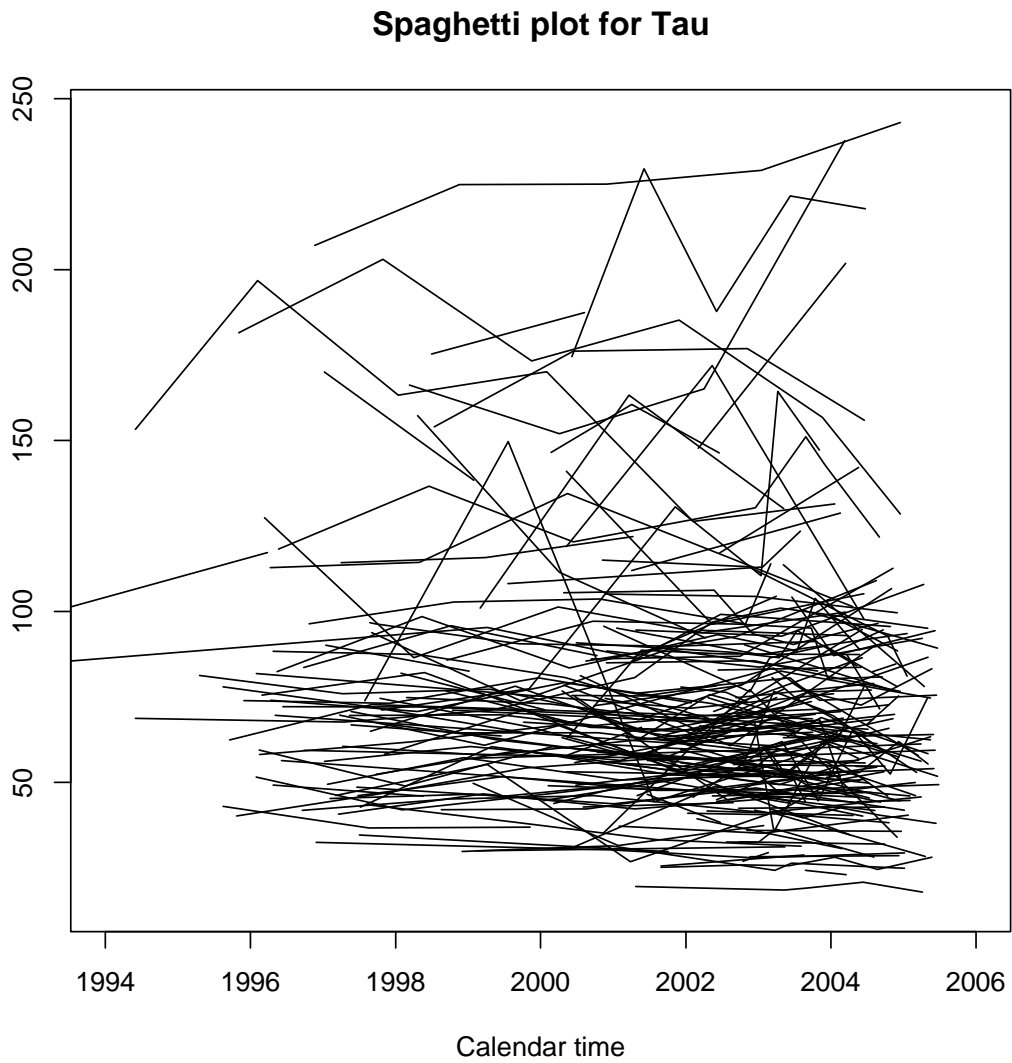

**Figure e-3:** Spaghetti plot for CSF tau values for each subject, with one data point for each measurement and lines connecting the measurements for the same subject.
