# Supplementary material
Source: PubMed Central journal article supplement (PMC3821715)
Supplement: supp_01.wnl.0000435558.98447.17_Table_e-1.pdf [file supp_01.wnl.0000435558.98447.17_Table_e-1.pdf]

**Table e-1**

**1a. Number of CSF Specimens Collected Per Subject**

|                           |     |    |    |    |    |   |   |
|---------------------------|-----|----|----|----|----|---|---|
| Number of CSF collections | 1   | 2  | 3  | 4  | 5  | 6 | 7 |
| Number of subjects        | 117 | 68 | 51 | 31 | 27 | 9 | 4 |

**1b. Time Interval Between CSF Specimens Collected at Consecutive Visits**

| Visit number                   | V1-V2 | V2-V3 | V3-V4 | V4-V5 | V5-V6 | V6-V7 |
|--------------------------------|-------|-------|-------|-------|-------|-------|
| Number of subjects             | 190   | 122   | 71    | 40    | 13    | 4     |
| Mean time between visits (yrs) | 1.99  | 1.83  | 1.67  | 1.22  | 0.95  | 1.03  |
| Standard deviation (yrs)       | 1.14  | 1.12  | 0.73  | 0.69  | 0.63  | 0.66  |
